# Supplementary material
Source: Springer Nature journal article supplement (https://www.springermedizin.de/resource/supplementary/13058_2004_961_MOESM4_ESM.pdf/9705738)

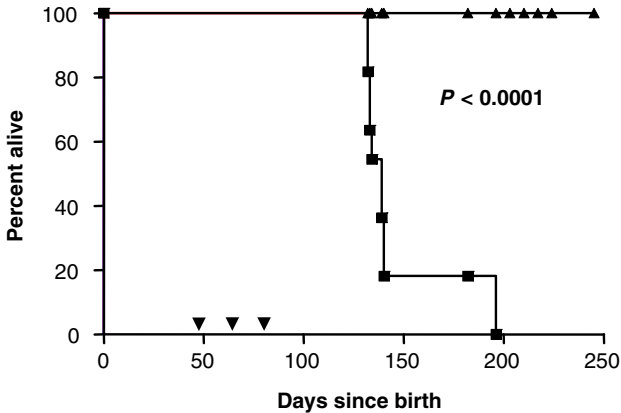

Supplement: MOESM4 [file 9705738]
